# Supplementary material
Source: PubMed Central journal article supplement (PMC6684450)
Supplement: NIHMS1532689-supplement-1.pdf [file NIHMS1532689-supplement-1.pdf]

# Supplemental Figure 1. KMO inhibition lowers PD-1 expression in PBMC CD4+ and CD8+ T cells in SIV-infected animals

## A (CD4)

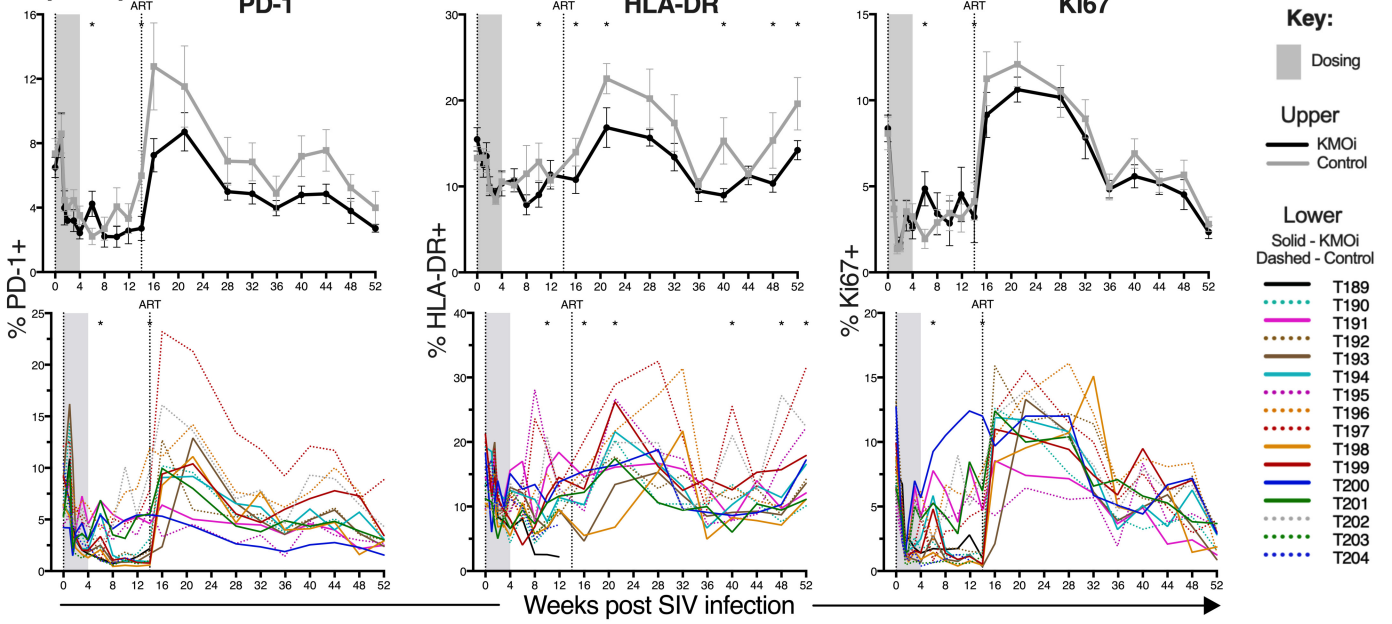

## B (CD8)

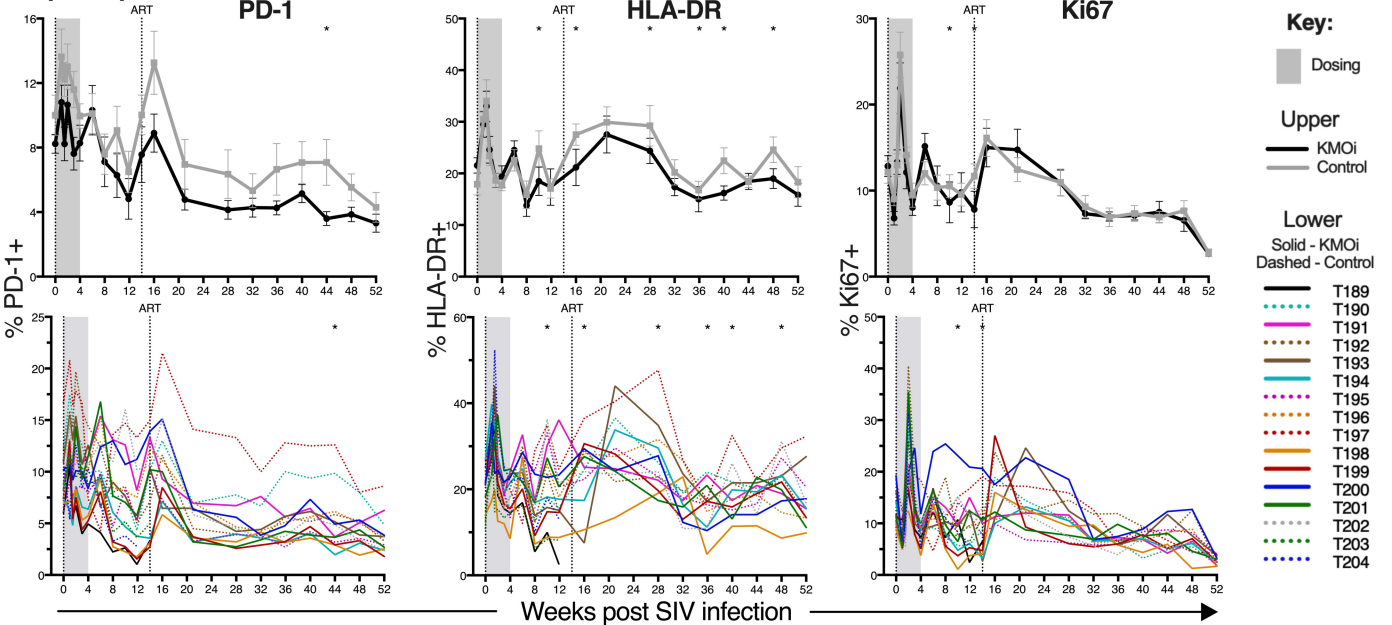

Grey shading indicates the dosing period and the vertical line shows cART initiation. Graphs represent % CD4+ T cells (A) and % CD8+ T cells (B) positive for the indicated activation markers in PBMCs as measured by flow cytometry. KMOi-treated (black) and control animals (grey) are represented with mean $\pm$ SE shown in upper panels and individual animals in lower panels. Differences between treatment groups in the change from baseline were assessed with linear mixed models.

## Supplemental Figure 2. KMO inhibition increases naïve PBMC CD4+ T cell frequency in SIV-infected animals

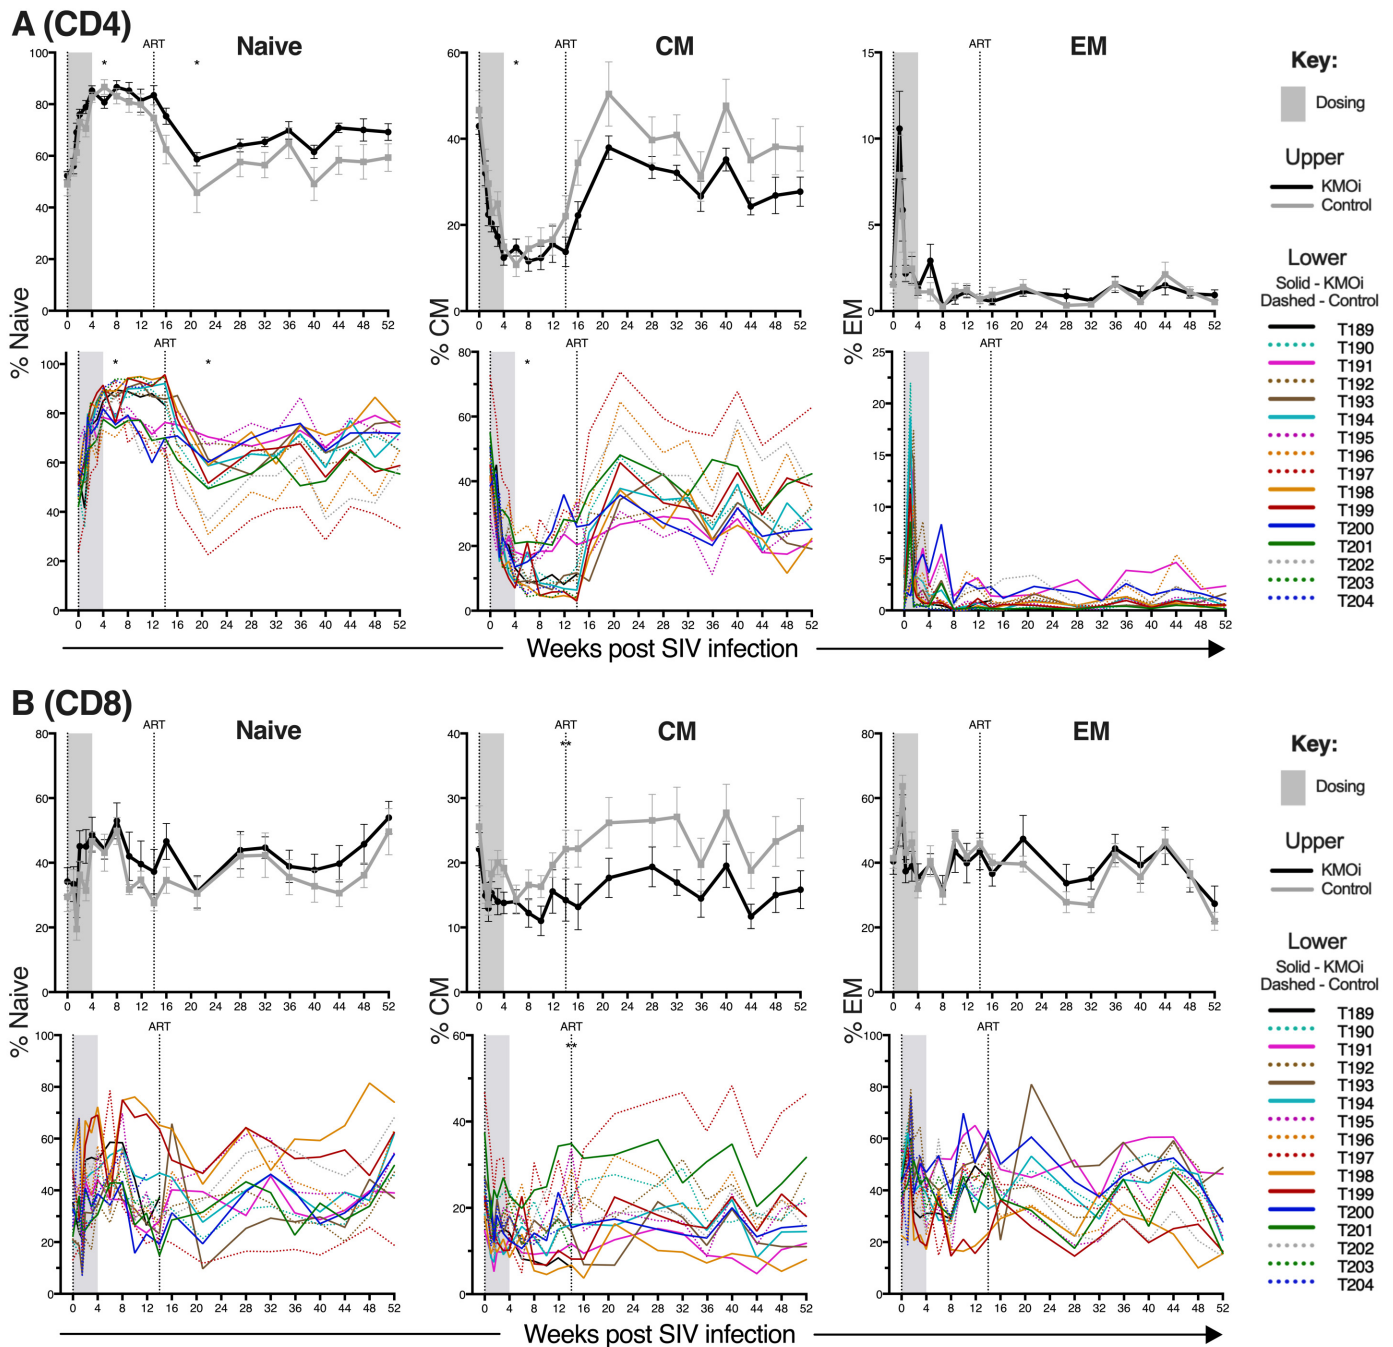

Grey shading indicates the dosing period and the vertical line shows cART initiation. Graphs represent % CD4+ T cells (A) and % CD8+ T cells (B) identified as naïve (left), central memory (center), or effector memory (right) in PBMCs as measured by flow cytometry. KMOi-treated (black) and control animals (grey) are represented with mean $\pm$ SE shown in upper panels and individual animals in lower panels. Differences between treatment groups in the change from baseline were assessed with linear mixed models.

# Supplemental Figure 3. PD-1 MFI is decreased by KMOi treatment

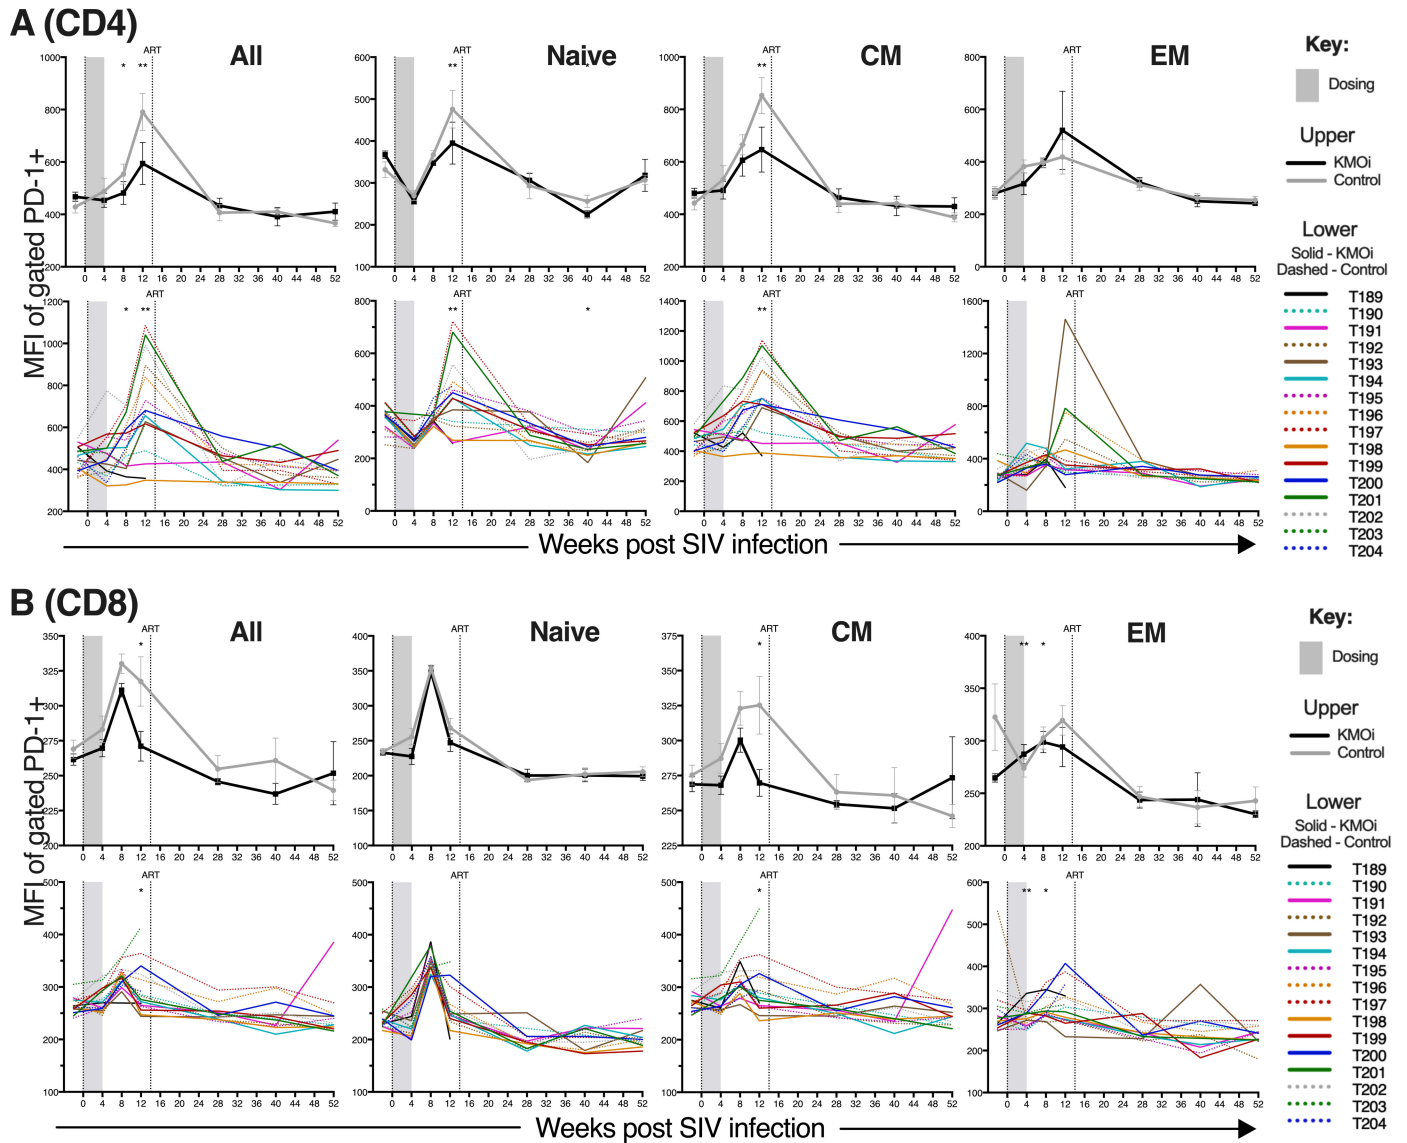

Grey shading indicates the dosing period and the vertical line shows cART initiation. Graphs represent the MFI of gated PD-1+ CD4+ T cells (A) and CD8+ T cells (B) in total, naïve, central memory, and effector memory LN subsets as measured by flow cytometry. KMOi-treated (black) and control animals (grey) are represented with mean  $\pm$  SE in upper panels and individual animals in lower panels. Differences between treatment groups in the change from baseline were assessed with linear mixed models.

## Supplemental Figure 4. IL-17 expression and SIV specific cytokine production are not enhanced by KMOi treatment

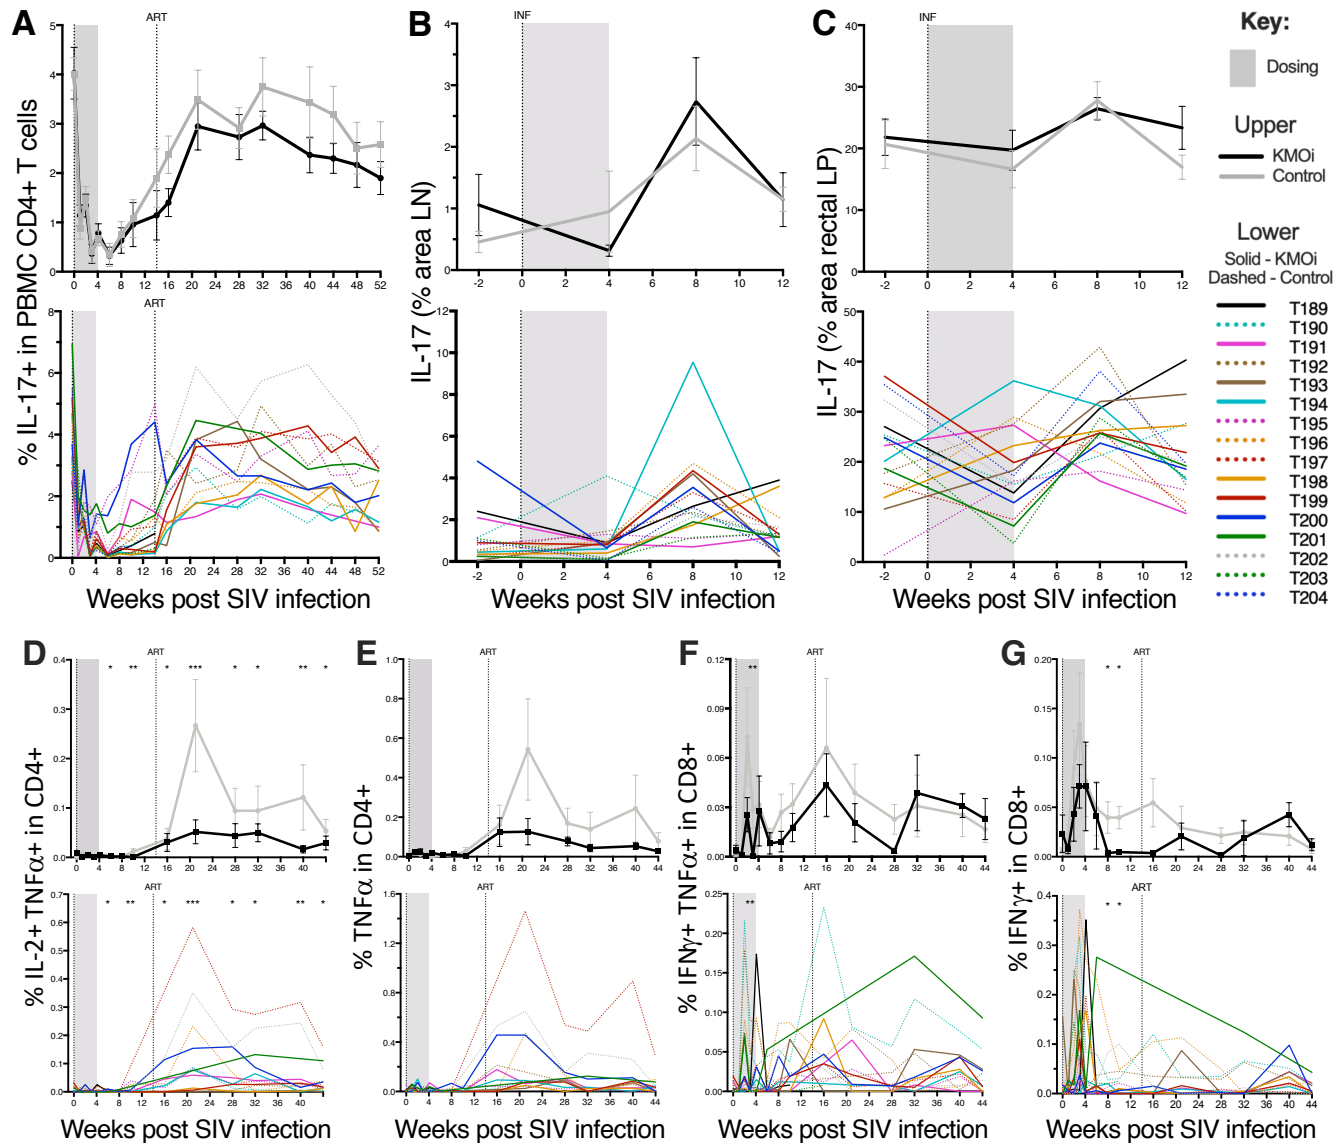

Grey shading indicates the dosing period and the vertical line shows cART initiation. In upper panels, graphs represent % IL-17+ CD4+ T cells in PBMC by flow cytometry (A) % area IL-17+ in pLN by ISH (B), and % area IL-17+ in rectal lamina propria by ISH (C). In lower panels, the two highest SIV-specific cytokine producing subsets from both CD4+ and CD8+ T cells are shown. Graphs represent % IL-2+TNF $\alpha$ + CD4+ T cells (D), % TNF $\alpha$ + CD4+ T cells (E), % IFN $\gamma$ +TNF $\alpha$ + CD8+ T cells (F), and % IFN $\gamma$ + CD8+ T cells (G) in PBMC by flow. KMOi-treated (black) and control animals (grey) are represented with mean $\pm$ -SE in upper panels and individual animals in lower panels. Differences between treatment groups in the change from baseline were assessed with linear mixed models.
